# Supplementary material
Source: HighWire-hosted journal article supplement (https://bmjopen.bmj.com/content/9/7/e024692)

# Online Appendix 1: Safer sex and relationships in FE (SaFE): Intervention logic model

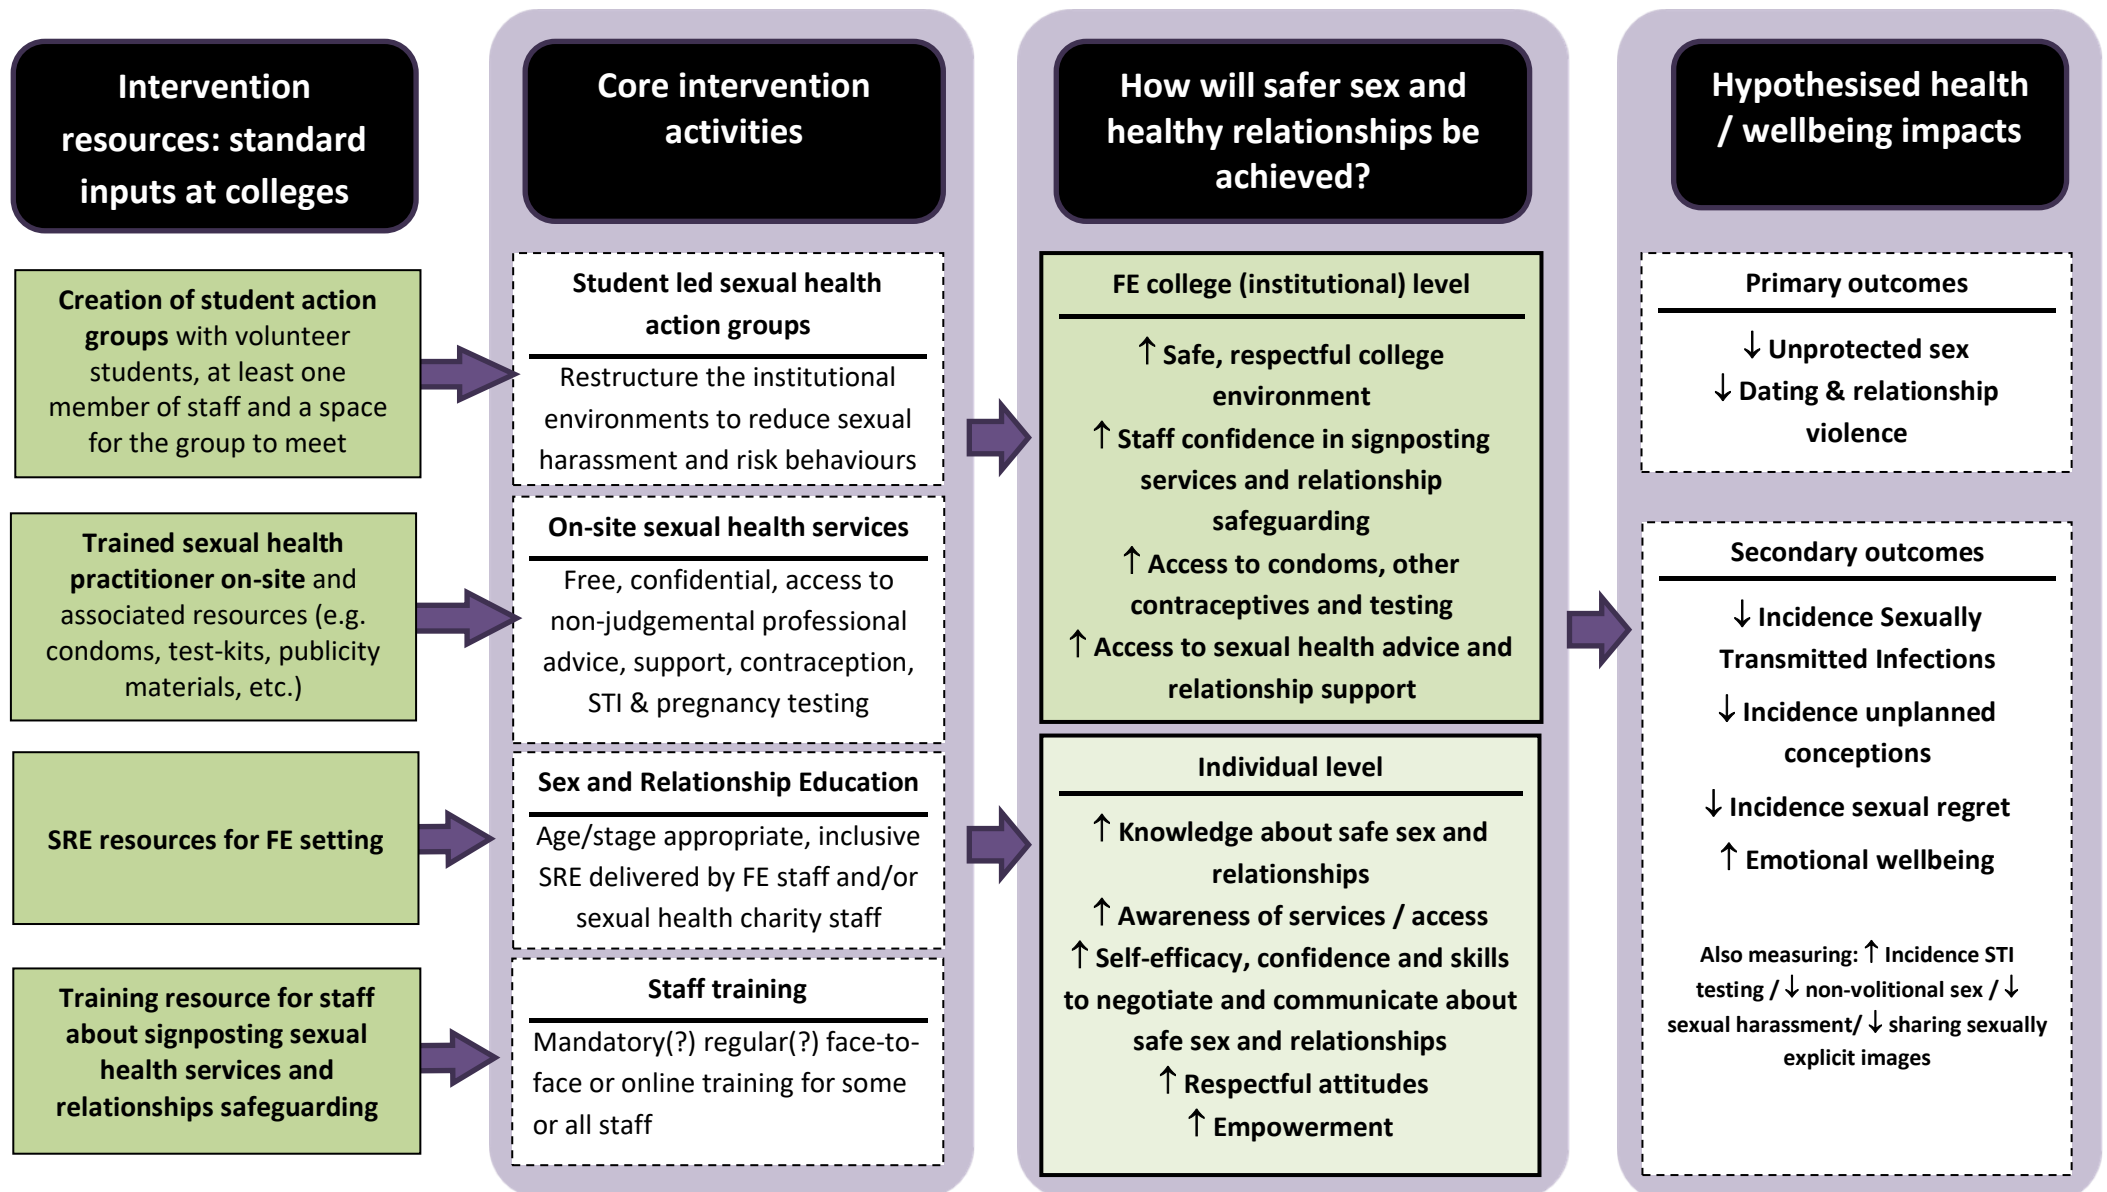

Supplement: inline-supplementary-material-1 [file inline-supplementary-material-1.pdf]
